# Supplementary material
Source: PubMed Central journal article supplement (PMC6748328)
Supplement: NIHMS1011126-supplement-Supplemental.pdf [file NIHMS1011126-supplement-Supplemental.pdf]

## **MIR-144 Mediated NRF2 Gene Silencing Inhibits Fetal Hemoglobin Expression in Sickle Cell Disease**

Biaoru Li<sup>1</sup>, Xingguo Zhu<sup>1</sup>, Christina M. Ward<sup>2</sup>, Athena Starlard-Davenport<sup>3</sup>, Mayuko Takezaki<sup>1</sup>, Amber Berry<sup>4</sup>, Alexander Ward<sup>1</sup>, Caroline Wilder<sup>5</sup>, Cindy Neunert<sup>6</sup>, Abdullah Kutlar<sup>7</sup>, and \*Betty S. Pace<sup>1,8</sup>

<sup>1</sup>Department of Pediatrics, Augusta University, Augusta, GA, <sup>2</sup>Department of Biochemistry and Molecular Biology, Boston University <sup>3</sup>Department of Genetics, Genomics and Informatics, University of Tennessee Health Sciences Center, Memphis TN, <sup>4</sup>Medical College of Georgia, Augusta, GA, <sup>5</sup>Department of Otolaryngology, Augusta University, Augusta, GA, <sup>6</sup>Department of Pediatrics, Columbia University, New York, NY, <sup>7</sup>Department of Medicine, Augusta University, Augusta, GA, <sup>8</sup>Department of Biochemistry and Molecular Biology, Augusta University, Augusta, GA

### **\*Corresponding author:**

Betty S. Pace, MD, Department of Pediatrics, Augusta University, 1120 15<sup>th</sup> St. CN-4112, Augusta, GA 30912

Tel: 706-721-6893; Fax: 706-721-0174; E-mail: [bpace@augusta.edu](mailto:bpace@augusta.edu)

## Supplemental Material

| <b>Table S1. Summary of clinical phenotype data.</b> |                    |                 |                            |                          |
|------------------------------------------------------|--------------------|-----------------|----------------------------|--------------------------|
| <b>Subject Number</b>                                | <b>Age (years)</b> | <b>Genotype</b> | <b>Hydroxyurea therapy</b> | <b>RBC transfusions*</b> |
| <b>001</b>                                           | 5                  | HbSS            | Never treated              | None                     |
| <b>003</b>                                           | 11                 | HbSS            | Never treated              | None                     |
| <b>08A</b>                                           | 18                 | HbSS            | Never treated              | None                     |
| <b>014</b>                                           | 6                  | HbSS            | Never treated              | None                     |
| <b>015</b>                                           | 4                  | HbSS            | Never treated              | None                     |
| <b>016</b>                                           | 7                  | HbSS            | Never treated              | None                     |
| <b>004</b>                                           | 4                  | HbSS            | Never treated              | None                     |
| <b>008</b>                                           | 10                 | HbSS            | Never treated              | None                     |
| <b>009</b>                                           | 18                 | HbSS            | Never treated              | None                     |
| <b>011</b>                                           | 4                  | HbSS            | Never treated              | None                     |
| <b>011A</b>                                          | 26                 | HbSS            | Never treated              | None                     |
| <b>012A</b>                                          | 18                 | HbSS            | Never treated              | None                     |

\*No transfusion within 4 months of study enrollment.

**Table S2. Summary of genes >1.5-fold up-regulated and down-regulated in the two SCD study groups.****A. miRNA genes up-regulated in Low HbF compared to High HbF**

|     | <b>UniqueID</b> | <b>Mean of LFH</b> | <b>Mean of HFH</b> | <b>Fold</b> |
|-----|-----------------|--------------------|--------------------|-------------|
| 1.  | hsa-miR-144-5p  | 1.09479787         | 0.13750352         | 7.961963    |
| 2.  | hsa-miR-144-3p  | 1.071796715        | 0.13750352         | 7.794686    |
| 3.  | hsa-miR-486-5p  | 0.865969221        | 0.13750352         | 6.297797    |
| 4.  | hsa-miR-3940-5p | 0.639115736        | 0.138339241        | 4.619916    |
| 5.  | hsa-miR-660-3p  | 0.851470495        | 0.187613818        | 4.538421    |
| 6.  | hsa-miR-1976    | 0.861867274        | 0.20058734         | 4.296718    |
| 7.  | hsa-miR-363-3p  | 0.585060616        | 0.13750352         | 4.254877    |
| 8.  | hsa-miR-3124-3p | 0.564015831        | 0.13750352         | 4.101828    |
| 9.  | hsa-miR-20a-5p  | 0.569472695        | 0.149379931        | 3.812244    |
| 10. | hsa-miR-32-5p   | 0.531557327        | 0.150052597        | 3.542473    |
| 11. | hsa-miR-106b-5p | 0.807917714        | 0.23079437         | 3.500595    |
| 12. | hsa-miR-101-3p  | 0.635670707        | 0.187217072        | 3.395367    |
| 13. | hsa-miR-96-5p   | 0.603209342        | 0.177911858        | 3.390495    |
| 14. | hsa-miR-19b-3p  | 0.765209913        | 0.230056425        | 3.326184    |
| 15. | hsa-miR-4456    | 0.448119486        | 0.13750352         | 3.258967    |
| 16. | hsa-miR-4540    | 0.443508794        | 0.13750352         | 3.225436    |
| 17. | hsa-miR-3182    | 0.438093866        | 0.13750352         | 3.186056    |
| 18. | hsa-let-7b-5p   | 0.841458807        | 0.264309853        | 3.183607    |
| 19. | hsa-miR-3667-5p | 0.439350694        | 0.139389185        | 3.151971    |
| 20. | hsa-miR-15a-5p  | 0.614141504        | 0.195854669        | 3.1357      |
| 21. | hsa-miR-142-3p  | 0.761057307        | 0.243364217        | 3.127236    |
| 22. | hsa-miR-424-5p  | 0.542625631        | 0.180081499        | 3.013223    |
| 23. | hsa-miR-3136-3p | 0.404627373        | 0.13750352         | 2.942669    |
| 24. | hsa-miR-5000-3p | 0.401119163        | 0.13750352         | 2.917156    |
| 25. | hsa-miR-3686    | 0.445757652        | 0.15533453         | 2.869662    |
| 26. | hsa-miR-4639-3p | 0.447934757        | 0.158151155        | 2.83232     |
| 27. | hsa-miR-16-5p   | 0.438280617        | 0.155648388        | 2.815838    |
| 28. | hsa-miR-19a-3p  | 0.61979119         | 0.221802562        | 2.794337    |
| 29. | hsa-miR-192-5p  | 0.383849884        | 0.13750352         | 2.791564    |
| 30. | hsa-miR-182-5p  | 0.378368601        | 0.13750352         | 2.751701    |
| 31. | hsa-let-7f-5p   | 0.555343936        | 0.203320769        | 2.731368    |
| 32. | hsa-miR-3611    | 0.389109363        | 0.143840211        | 2.70515     |
| 33. | hsa-miR-1255a   | 0.365224272        | 0.13750352         | 2.656109    |
| 34. | hsv1-miR-H4-3p  | 0.384212226        | 0.146542562        | 2.621847    |
| 35. | hsa-miR-3680-5p | 0.932082653        | 0.356540663        | 2.614239    |
| 36. | hsa-miR-4728-3p | 0.729156837        | 0.283946574        | 2.567937    |

|     |                  |             |             |          |
|-----|------------------|-------------|-------------|----------|
| 37. | hsa-let-7c-5p    | 0.597633099 | 0.238662377 | 2.504094 |
| 38. | hsa-miR-20b-5p   | 0.344011828 | 0.13750352  | 2.50184  |
| 39. | hsa-miR-3178     | 0.376580805 | 0.15156475  | 2.48462  |
| 40. | hsa-miR-140-5p   | 0.450189715 | 0.182744873 | 2.463488 |
| 41. | hsa-let-7a-5p    | 0.463280454 | 0.191771959 | 2.415788 |
| 42. | hsa-miR-5193     | 0.329797874 | 0.13750352  | 2.398469 |
| 43. | hsa-miR-3133     | 0.40738226  | 0.16986721  | 2.39824  |
| 44. | hsa-miR-4764-3p  | 0.523633371 | 0.221650819 | 2.362425 |
| 45. | hsa-miR-15b-5p   | 0.471860195 | 0.200196179 | 2.356989 |
| 46. | hsa-miR-362-3p   | 0.323882908 | 0.13750352  | 2.355452 |
| 47. | hsa-miR-3195     | 0.320663402 | 0.13750352  | 2.332038 |
| 48. | hsa-miR-197-3p   | 0.335016857 | 0.144325385 | 2.321261 |
| 49. | hsa-miR-190a-5p  | 0.68762134  | 0.297839147 | 2.3087   |
| 50. | hsa-miR-4290     | 0.313257769 | 0.13750352  | 2.27818  |
| 51. | hsa-miR-4742-3p  | 0.305071801 | 0.13750352  | 2.218647 |
| 52. | hsa-miR-373-5p   | 0.342954288 | 0.154890882 | 2.214167 |
| 53. | hsa-miR-185-5p   | 0.4776253   | 0.215715915 | 2.21414  |
| 54. | hsa-miR-4443     | 0.31517973  | 0.142648697 | 2.209482 |
| 55. | hsa-miR-106a-5p  | 0.377459993 | 0.172194016 | 2.192062 |
| 56. | hsa-miR-17-5p    | 0.349814489 | 0.16153767  | 2.165529 |
| 57. | hsa-miR-642b-5p  | 0.473200947 | 0.219803467 | 2.152837 |
| 58. | hsa-miR-664b-3p  | 0.290123314 | 0.13750352  | 2.109934 |
| 59. | hsa-let-7g-5p    | 0.423036719 | 0.203668522 | 2.077084 |
| 60. | hsa-miR-33b-5p   | 0.520613859 | 0.252659592 | 2.060535 |
| 61. | hsa-miR-28-3p    | 0.551039989 | 0.268697158 | 2.050785 |
| 62. | hsa-miR-550b-3p  | 0.28044952  | 0.13750352  | 2.039581 |
| 63. | hsa-miR-363-5p   | 0.273282001 | 0.13750352  | 1.987455 |
| 64. | hsa-miR-223-3p   | 0.70924748  | 0.35975493  | 1.971474 |
| 65. | hsa-miR-335-3p   | 0.295257881 | 0.150271013 | 1.964836 |
| 66. | hsa-miR-18b-5p   | 0.376082992 | 0.196184861 | 1.916983 |
| 67. | hsa-miR-5684     | 0.267029832 | 0.139317967 | 1.916693 |
| 68. | hsa-miR-1273g-3p | 0.260580098 | 0.13750352  | 1.895079 |
| 69. | hsa-miR-374a-5p  | 0.301869228 | 0.161549548 | 1.868586 |
| 70. | hsa-miR-92a-3p   | 0.271638965 | 0.14560015  | 1.86565  |
| 71. | hsa-miR-7-5p     | 0.495201329 | 0.265618722 | 1.864331 |
| 72. | hsa-miR-548as-3p | 0.333050797 | 0.179360357 | 1.856881 |
| 73. | hsa-miR-3148     | 0.251200219 | 0.13750352  | 1.826864 |
| 74. | hsa-miR-374a-3p  | 0.456135    | 0.253693201 | 1.797979 |
| 75. | hsa-miR-30b-5p   | 0.347093041 | 0.198833287 | 1.745649 |
| 76. | hsa-miR-3685     | 0.427613149 | 0.247670052 | 1.726544 |
| 77. | hsa-miR-767-5p   | 0.355502735 | 0.206478298 | 1.721744 |

|                                                                                    |                    |             |             |          |
|------------------------------------------------------------------------------------|--------------------|-------------|-------------|----------|
| 78.                                                                                | hsa-miRPlus-A1087  | 1.005028288 | 0.59570921  | 1.687112 |
| 79.                                                                                | hsa-let-7i-5p      | 0.331813296 | 0.19744503  | 1.680535 |
| 81.                                                                                | hsa-miR-3606-5p    | 0.304687783 | 0.182387548 | 1.670551 |
| 82.                                                                                | hsa-miR-4306       | 0.351285994 | 0.215207716 | 1.632311 |
| 83.                                                                                | hsa-miR-140-3p     | 0.366259317 | 0.228070048 | 1.605907 |
| 84.                                                                                | hsa-miR-4286       | 0.298559616 | 0.186332467 | 1.602295 |
| 85.                                                                                | hsa-miR-501-5p     | 0.606995771 | 0.379401689 | 1.599876 |
| 86.                                                                                | hsa-miR-4508       | 0.340902343 | 0.22531308  | 1.513016 |
| 87.                                                                                | hsa-miR-4297       | 0.308132519 | 0.203853903 | 1.511536 |
| 88.                                                                                | SNORD12            | 0.576184829 | 0.381266619 | 1.511239 |
| 89.                                                                                | hsa-miR-1827       | 0.300866216 | 0.200042297 | 1.504013 |
| <b>B. miRNA genes &gt;1.5-fold down-regulation in Low HbF compared to High HbF</b> |                    |             |             |          |
| 90.                                                                                | hsa-miR-548k       | 0.526617696 | 0.794086168 | -1.5079  |
| 91.                                                                                | hsa-miR-31-5p      | 0.24490121  | 0.370707192 | -1.5137  |
| 92.                                                                                | hsa-miR-744-5p     | 0.140254105 | 0.213169088 | -1.51988 |
| 93.                                                                                | hsa-miR-1275       | 0.13750352  | 0.209522737 | -1.52376 |
| 94.                                                                                | hsa-miR-371b-3p    | 0.321478665 | 0.497433307 | -1.54733 |
| 95.                                                                                | hsa-miR-204-3p     | 0.21927695  | 0.33958324  | -1.54865 |
| 96.                                                                                | SNORD49A           | 0.13750352  | 0.212963673 | -1.54879 |
| 97.                                                                                | hsa-miR-1913       | 0.710434849 | 1.10181878  | -1.55091 |
| 98.                                                                                | hsv1-miR-H1-3p     | 0.670087328 | 1.046449562 | -1.56166 |
| 99.                                                                                | hsa-miR-151a-5p    | 0.174738651 | 0.279452768 | -1.59926 |
| 100.                                                                               | hsa-miR-378c       | 0.309663246 | 0.49590637  | -1.60144 |
| 101.                                                                               | hsa-miR-335-5p     | 0.145147736 | 0.233306388 | -1.60737 |
| 102.                                                                               | hsa-miR-378e       | 0.14585572  | 0.237691623 | -1.62964 |
| 103.                                                                               | hsa-miR-652-3p     | 0.13750352  | 0.224599354 | -1.63341 |
| 104.                                                                               | hsa-miR-10b-3p     | 0.675632646 | 1.111300739 | -1.64483 |
| 105.                                                                               | hsa-miR-27b-3p     | 0.13750352  | 0.229083461 | -1.66602 |
| 106.                                                                               | hsv2-miR-H10       | 0.137633334 | 0.229621651 | -1.66836 |
| 107.                                                                               | hsa-miR-4328       | 0.13750352  | 0.229621651 | -1.66993 |
| 108.                                                                               | hsv2-miR-H24       | 0.416211476 | 0.695982724 | -1.67219 |
| 109.                                                                               | hsa-miR-4291       | 0.13750352  | 0.230693214 | -1.67773 |
| 110.                                                                               | ebv-miR-BHRF1-2-3p | 0.156465024 | 0.263392128 | -1.68339 |
| 111.                                                                               | hsa-miR-26a-5p     | 0.13750352  | 0.233893851 | -1.701   |
| 112.                                                                               | hsa-miR-1321       | 0.139441729 | 0.238851691 | -1.71291 |
| 113.                                                                               | hsa-miR-4436b-3p   | 0.142664755 | 0.244546182 | -1.71413 |
| 114.                                                                               | hsa-miR-625-3p     | 0.16115209  | 0.276760668 | -1.71739 |
| 115.                                                                               | hsa-miR-143-3p     | 0.168386489 | 0.291325641 | -1.7301  |
| 116.                                                                               | hsa-miR-103a-3p    | 0.174743901 | 0.303572697 | -1.73724 |
| 117.                                                                               | hsa-miR-338-3p     | 0.353828117 | 0.615812806 | -1.74043 |
| 118.                                                                               | hsa-miR-505-5p     | 0.378450314 | 0.667859236 | -1.76472 |

|      |                                   |             |             |          |
|------|-----------------------------------|-------------|-------------|----------|
| 119. | hsa-miR-3675-3p                   | 0.13750352  | 0.243094196 | -1.76791 |
| 120. | hsa-miR-4284                      | 0.13750352  | 0.243812146 | -1.77313 |
| 121. | hsa-miR-152-3p                    | 0.13750352  | 0.244345543 | -1.77701 |
| 122. | hsa-miR-4646-3p                   | 0.409116854 | 0.733000949 | -1.79167 |
| 123. | hsa-miR-4723-3p                   | 0.837650607 | 1.512273391 | -1.80537 |
| 124. | hsa-miR-193a-5p                   | 0.444121659 | 0.80830431  | -1.82001 |
| 125. | hsa-miR-191-5p                    | 0.173793256 | 0.317004027 | -1.82403 |
| 126. | hsa-miR-664a-3p                   | 0.374088317 | 0.684991255 | -1.8311  |
| 127. | hsa-miR-550a-3-5p/hsa-miR-550a-5p | 0.148494368 | 0.271950148 | -1.83138 |
| 128. | hsa-miR-4769-3p                   | 0.422235752 | 0.785390891 | -1.86008 |
| 129. | hsa-miRPlus-A1015                 | 0.13750352  | 0.259047076 | -1.88393 |
| 130. | hsa-miR-3607-5p                   | 0.13750352  | 0.260857873 | -1.8971  |
| 131. | hsa-miR-3654                      | 0.13750352  | 0.263831519 | -1.91873 |
| 132. | hsa-miR-222-3p                    | 0.13750352  | 0.265360201 | -1.92984 |
| 133. | hsa-miR-425-5p                    | 0.138201346 | 0.268205285 | -1.94069 |
| 134. | hsa-miR-486-3p                    | 0.202410509 | 0.393610631 | -1.94462 |
| 135. | hsa-miR-483-5p                    | 0.168386489 | 0.330458313 | -1.9625  |
| 136. | hsa-miR-130b-3p                   | 0.157796065 | 0.311579789 | -1.97457 |
| 137. | hsa-miR-664b-5p                   | 0.148922876 | 0.304547509 | -2.045   |
| 138. | hsa-miR-151a-5p/hsa-miR-151b      | 0.13750352  | 0.283933627 | -2.06492 |
| 139. | hsa-miR-4311                      | 0.294961244 | 0.615186691 | -2.08565 |
| 140. | hsa-miR-1281                      | 0.427120537 | 0.910565893 | -2.13187 |
| 141. | hsa-miR-4780                      | 0.13750352  | 0.300081822 | -2.18236 |
| 142. | SNORD118                          | 0.13750352  | 0.300364802 | -2.18442 |
| 143. | hsa-miR-1246                      | 0.13750352  | 0.304528447 | -2.2147  |
| 144. | hsa-miR-4687-5p                   | 0.213586489 | 0.473090723 | -2.21498 |
| 145. | hsa-miR-629-5p                    | 0.229916503 | 0.517708336 | -2.25172 |
| 146. | SNORD110                          | 0.173667938 | 0.394852941 | -2.27361 |
| 147. | hsa-miR-3653                      | 0.14573139  | 0.332049218 | -2.2785  |
| 148. | hsa-miR-4288                      | 0.13750352  | 0.315991327 | -2.29806 |
| 149. | hsa-miR-146a-5p                   | 0.13750352  | 0.316849003 | -2.3043  |
| 150. | hsa-miR-625-5p                    | 0.13750352  | 0.318150538 | -2.31376 |
| 151. | hsa-miR-2355-3p                   | 0.13750352  | 0.3252191   | -2.36517 |
| 152. | hsa-miR-29a-3p                    | 0.13750352  | 0.327009529 | -2.37819 |
| 153. | hsa-miR-1228-5p                   | 0.235323404 | 0.577493943 | -2.45404 |
| 154. | hsa-miR-146b-5p                   | 0.170156375 | 0.427330308 | -2.5114  |
| 155. | hsa-miR-377-3p                    | 0.13750352  | 0.346272958 | -2.51828 |
| 156. | hsa-miR-584-5p                    | 0.186135734 | 0.469648461 | -2.52315 |
| 157. | hsa-miR-145-5p                    | 0.281574557 | 0.719547053 | -2.55544 |
| 158. | hsa-miR-433-5p                    | 0.187515914 | 0.479982163 | -2.55969 |
| 159. | SNORD4A                           | 0.13750352  | 0.356897029 | -2.59555 |

|      |                 |             |             |          |
|------|-----------------|-------------|-------------|----------|
| 160. | hsa-miR-199a-5p | 0.13750352  | 0.357352403 | -2.59886 |
| 161. | hsa-miR-3620-3p | 0.215832199 | 0.562310979 | -2.60532 |
| 162. | hsa-miR-125b-5p | 0.189632659 | 0.494794813 | -2.60923 |
| 163. | hsv1-miR-H7-3p  | 0.152291045 | 0.399610154 | -2.62399 |
| 164. | hsa-miR-484     | 0.177101562 | 0.466798219 | -2.63577 |
| 165. | hsa-miR-3607-3p | 0.13750352  | 0.366763932 | -2.66731 |
| 166. | SNORD48         | 0.138984049 | 0.37306532  | -2.68423 |
| 167. | SNORD32         | 0.160333171 | 0.439352353 | -2.74025 |
| 168. | hsa-miR-3924    | 0.16562598  | 0.466167492 | -2.81458 |
| 169. | hsa-miR-376c-3p | 0.13750352  | 0.391407728 | -2.84653 |
| 170. | hsa-miR-5010-3p | 0.251063605 | 0.728442465 | -2.90143 |
| 171. | hsa-miR-4312    | 0.300465718 | 0.880775273 | -2.93137 |
| 172. | SNORD2          | 0.13750352  | 0.41564969  | -3.02283 |
| 172. | hsa-miR-874-5p  | 0.148360446 | 0.488450413 | -3.29232 |
| 173. | hsa-miR-2116-3p | 0.13750352  | 0.457817979 | -3.3295  |
| 175. | hsa-miR-5701    | 0.13750352  | 0.4606099   | -3.3498  |
| 176. | SNORD10         | 0.142228305 | 0.493075406 | -3.46679 |
| 177. | hsa-miR-1       | 0.13750352  | 0.479908777 | -3.49016 |
| 178. | SNORD6          | 0.13750352  | 0.510241464 | -3.71075 |
| 179. | SNORD38B        | 0.13750352  | 0.523304125 | -3.80575 |
| 180. | SNORD13         | 0.13750352  | 0.526691621 | -3.83039 |

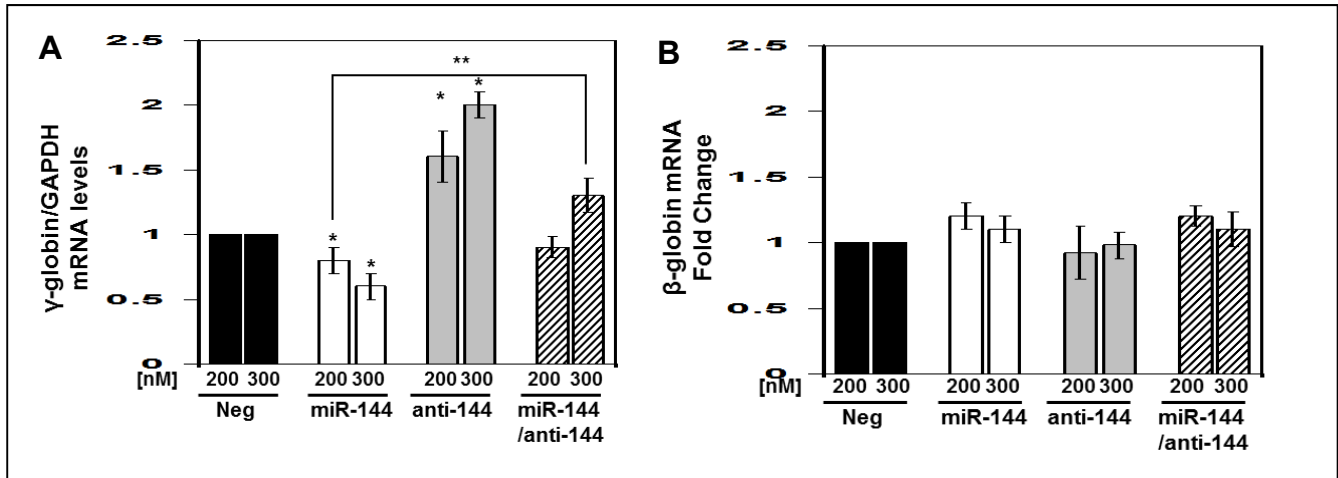

**Fig. S1. MiR-144 antagomir has no effect on  $\beta$ -globin gene expression.** CD34<sup>+</sup> stem cells were cultured as described in Materials and Method and previously published (Li B et al. *Haematologica* pii: haematol.2017.185967, 2018). On day 8 erythroid progenitors were treated with negative (Neg) miRNA mimic control, miR-144 mimic, antagomir (anti-miR-144) or combination for 48 hours. Total RNA was isolated for RT-qPCR analysis for  $\gamma$ -globin (A) and  $\beta$ -globin (B) expression normalized by GAPDH (See Methods). Data are shown at the mean  $\pm$  standard error of the mean.



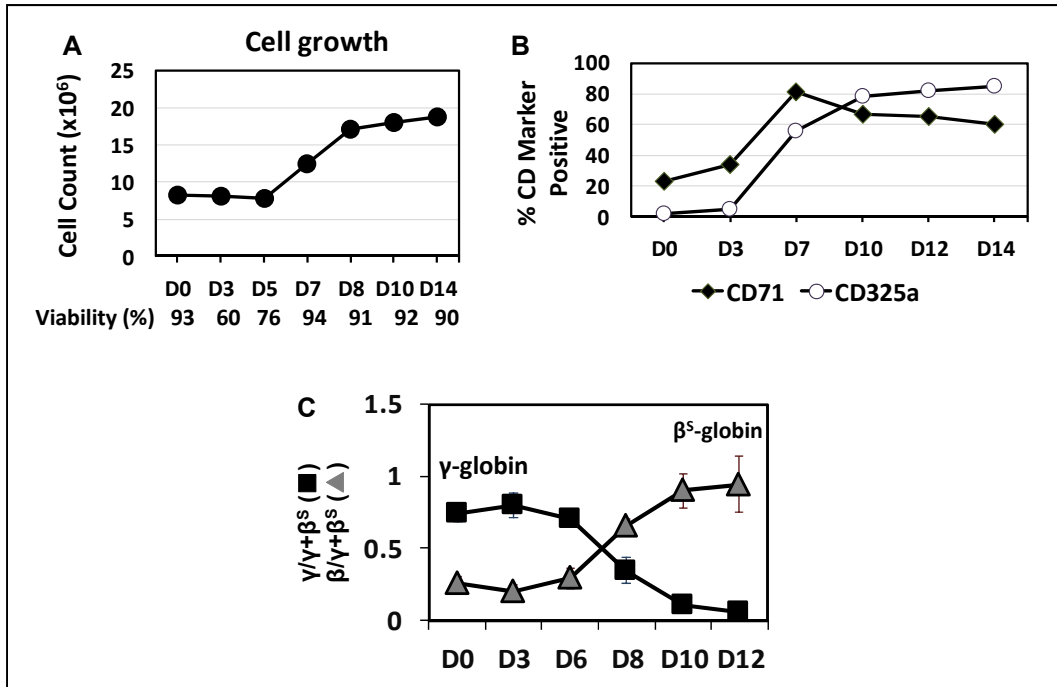

**Fig.S2 Characterization of sickle erythroid progenitor growth in primary culture.** After obtaining IRB approval, blood samples were collected from sickle cell patients and processed by ficoll histopaque separation of peripheral blood mononuclear cells (PBMCs) that were stored live in DMSO at -80°C. The PBMCs were grown in the two-phase culture system (See Methods) and then cells were harvested at day 0 through day 12 for cell growth and viability by Trypan blue exclusion (**A**). Cells were harvested for flow cytometry after staining with FITC-CD71 and PE-CD235a antibodies (**B**). To confirm globin gene switching in culture (**C**), RNA was harvested at each time point and RT-qPCR completed with glyceraldehyde-3-phosphate dehydrogenase (GAPDH) as internal control (See Methods).
